# Supplementary material for: Binding of alkyl halides in water-soluble cavitands with urea rims
Source: Royal Society of Chemistry journal article supplement (doi:10.1039/c8nj01567h), 2018-01-01
Supplement: c8nj01567h1.pdf [file c8nj01567h1.pdf]

# Binding of alkyl halides in water-soluble cavitands with urea rims

Yang Yu,<sup>\*a</sup> Yong-Sheng Li<sup>a</sup> and Julius Rebek, Jr.<sup>\*a,b</sup>

<sup>a</sup>Center for Supramolecular and Catalytic Chemistry and Department of Chemistry,  
Shanghai University, 99 Shang-Da Road, Shanghai 200444, China

<sup>b</sup>Skaggs Institute for Chemical Biology, The Scripps Research Institute, and Department  
of Chemistry, 10550 North Torrey Pines Road, La Jolla, CA 92037

e-mail: yangyu2017@shu.edu.cn; jrebek@scripps.edu

## Supporting Information

### Table of Contents

|                                                                                                                                 |    |
|---------------------------------------------------------------------------------------------------------------------------------|----|
| Instrumentation and materials.....                                                                                              | S2 |
| A general statement.....                                                                                                        | S2 |
| <sup>1</sup> H NMR spectra of the complexes of <i>n</i> -pentyl halides and 2 in D <sub>2</sub> O.....                          | S2 |
| <sup>1</sup> H NMR spectra of the complexes of <i>n</i> -pentyl halides and 3 in D <sub>2</sub> O.....                          | S3 |
| <sup>1</sup> H NMR spectra of the complexes of <i>n</i> -hexyl halides and 2 in D <sub>2</sub> O.....                           | S3 |
| <sup>1</sup> H NMR spectra of the complexes of <i>n</i> -hexyl halides and 3 in D <sub>2</sub> O.....                           | S4 |
| <sup>1</sup> H NMR spectra of the complexes of <i>n</i> -nonyl halides and 2 in D <sub>2</sub> O.....                           | S4 |
| <sup>1</sup> H NMR spectra of the complexes of <i>n</i> -nonyl halides and 3 in D <sub>2</sub> O.....                           | S5 |
| <sup>1</sup> H NMR spectra of the complexes of <i>n</i> -hexyl chloride, <i>n</i> -hexyl bromide and 2 in D <sub>2</sub> O..... | S5 |
| <sup>1</sup> H NMR spectra of the complexes of <i>n</i> -hexyl bromide, <i>n</i> -hexyl iodide and 2 in D <sub>2</sub> O.....   | S6 |
| <sup>1</sup> H NMR spectra of the complexes of <i>n</i> -hexyl chloride, <i>n</i> -hexyl iodide and 2 in D <sub>2</sub> O.....  | S6 |
| <sup>1</sup> H NMR spectra of the capsule of 2 and <i>n</i> -nonyl chloride formation in D <sub>2</sub> O.....                  | S7 |

**Instrumentation.**  $^1\text{H}$  NMR spectra were obtained at 600 MHz on a Bruker DRX-600 spectrometer equipped with a 5 mm DCH cryoprobe. Spectra were recorded at 298 K unless otherwise stated. Chemical shifts are expressed in parts per million ( $\delta$  scale) with respect to tetramethylsilane and are referenced to the proton signal of residual, non-deuterated solvent [ $\text{D}_2\text{O}$ :  $\delta$  4.79 for  $^1\text{H}$  NMR; ] for  $^1\text{H}$  NMR.

**Materials.** All reagents and solvents were purchased from commercial suppliers.

**A general statement.** The orientations of the tumbling guests were calculated from the percent of the maximum  $\Delta\delta$  that the observed  $\text{CH}_3$  signals represent. For example, the  $\text{CH}_3$  of the 1-chlorohexane appears at  $\Delta\delta = -3.9$  ppm (binding with cavitand **2**) which represents 80 % of the maximum  $\Delta\delta$  of -4.8 ppm ( $\text{CH}_3$  is down and at the bottom of cavitand **2**) with 20% of  $\Delta\delta$  of -0.4 ppm ( $\text{CH}_3$  is up and near the rim).

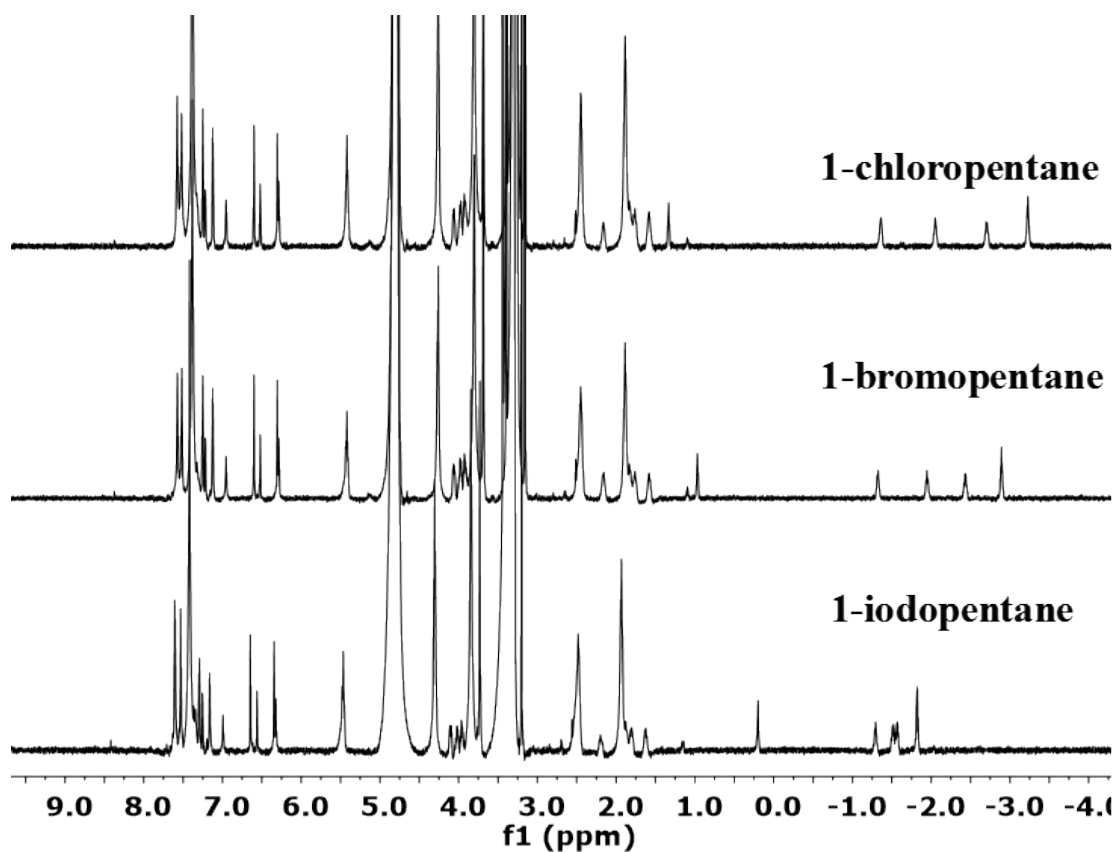

Figure S1.  $^1\text{H}$  NMR spectra (600MHz,  $\text{D}_2\text{O}$ , 298K) of cavitand **2** (1.0 mM) + 1-chloropentane (0.5 mM), cavitand **2** (1.0 mM) + 1-bromopentane (0.5 mM), cavitand **2** (1.0 mM) + 1-iodopentane (0.5 mM).

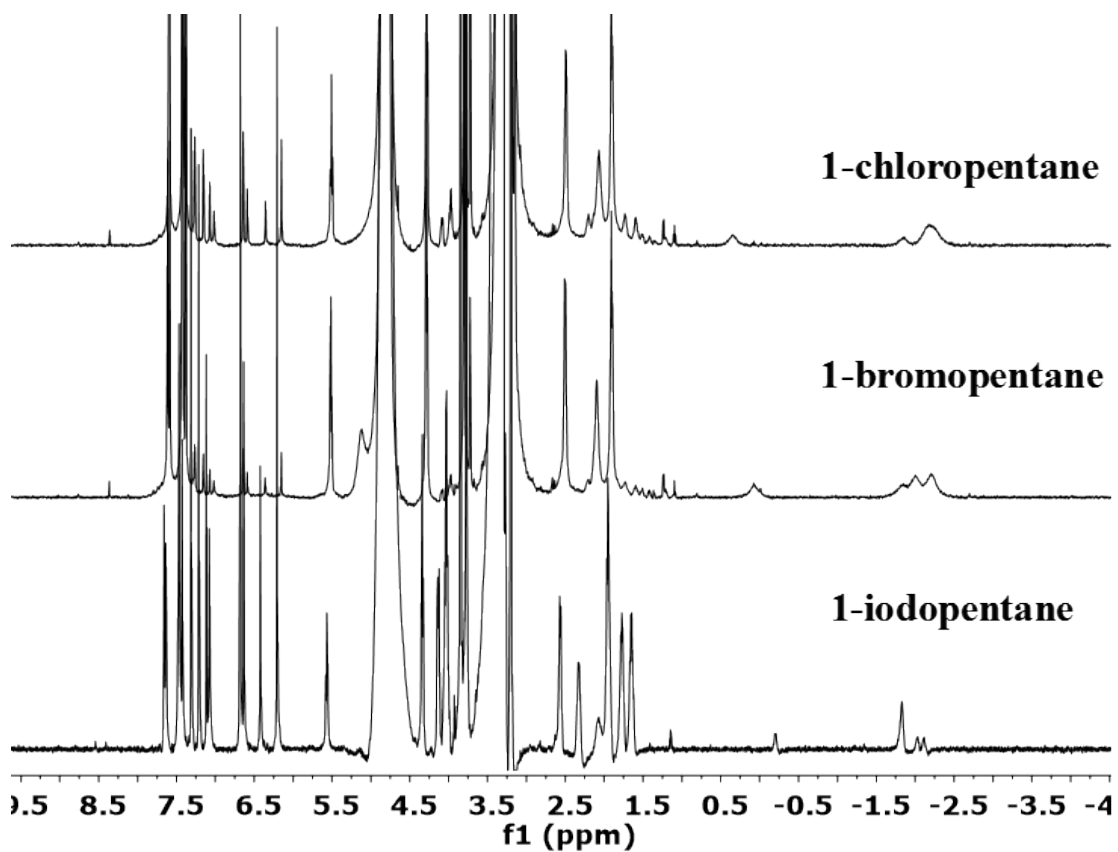

Figure S2. <sup>1</sup>H NMR spectra (600MHz, D<sub>2</sub>O, 298K) of cavitand **3** (1.0 mM) + 1-chloropentane (0.5 mM), cavitand **3** (1.0 mM) + 1-bromopentane (0.5 mM), cavitand **3** (1.0 mM) + 1-iodopentane (0.5 mM).

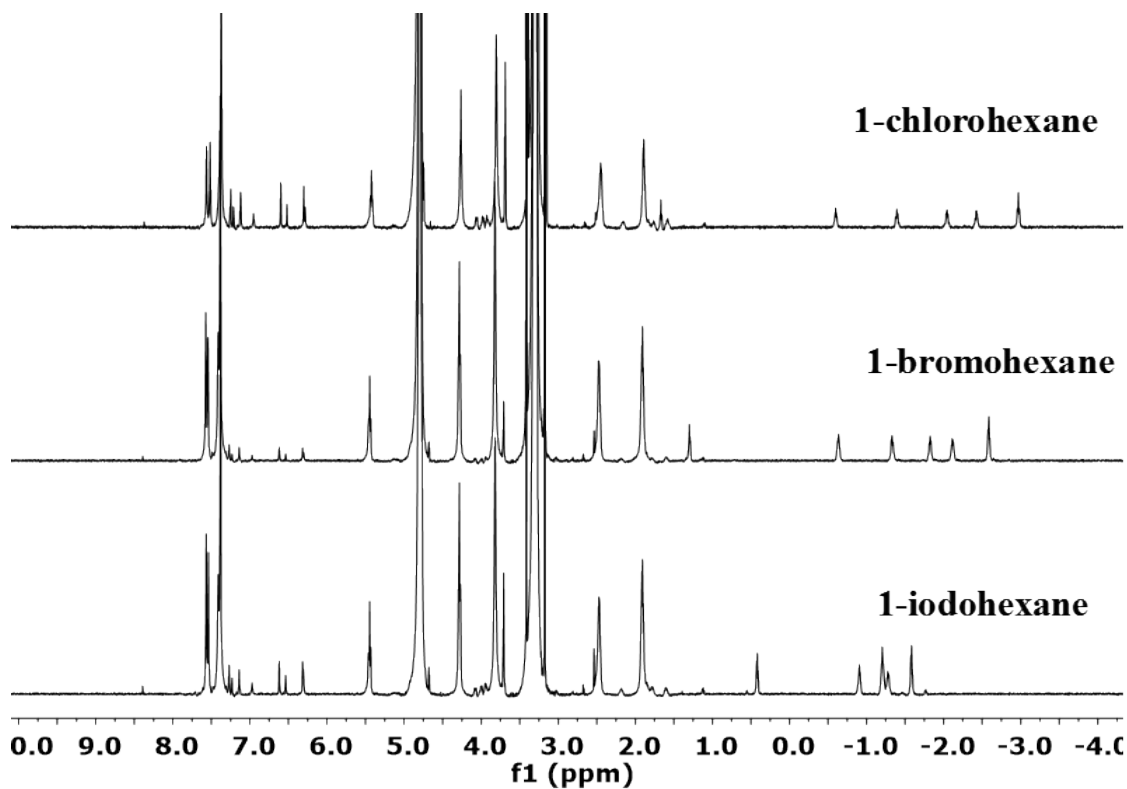

Figure S3.  $^1\text{H}$  NMR spectra (600MHz,  $\text{D}_2\text{O}$ , 298K) of cavitand **2** (1.0 mM) + 1-chlorohexane (0.5 mM), cavitand **2** (1.0 mM) + 1-bromohexane (0.5 mM), cavitand **2** (1.0 mM) + 1-iodohexane (0.5 mM).

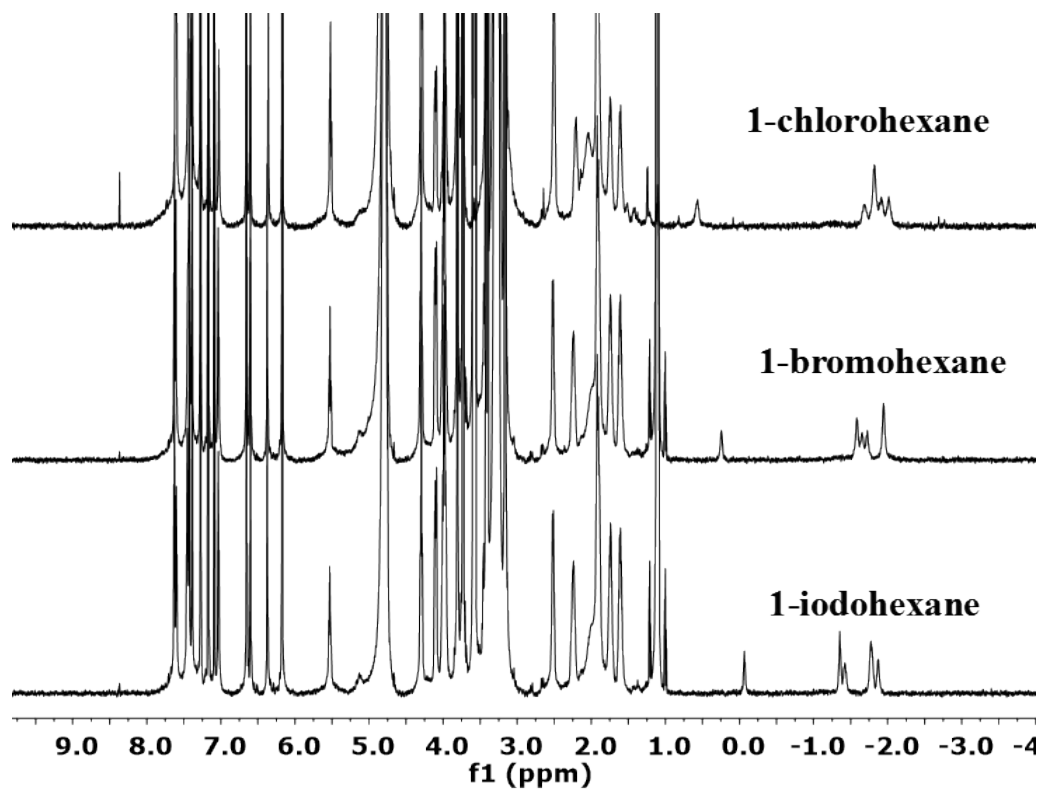

Figure S4.  $^1\text{H}$  NMR spectra (600MHz,  $\text{D}_2\text{O}$ , 298K) of cavitand **3** (1.0 mM) + 1-chlorohexane (0.5 mM), cavitand **3** (1.0 mM) + 1-bromohexane (0.5 mM), cavitand **3** (1.0 mM) + 1-iodohexane (0.5 mM).

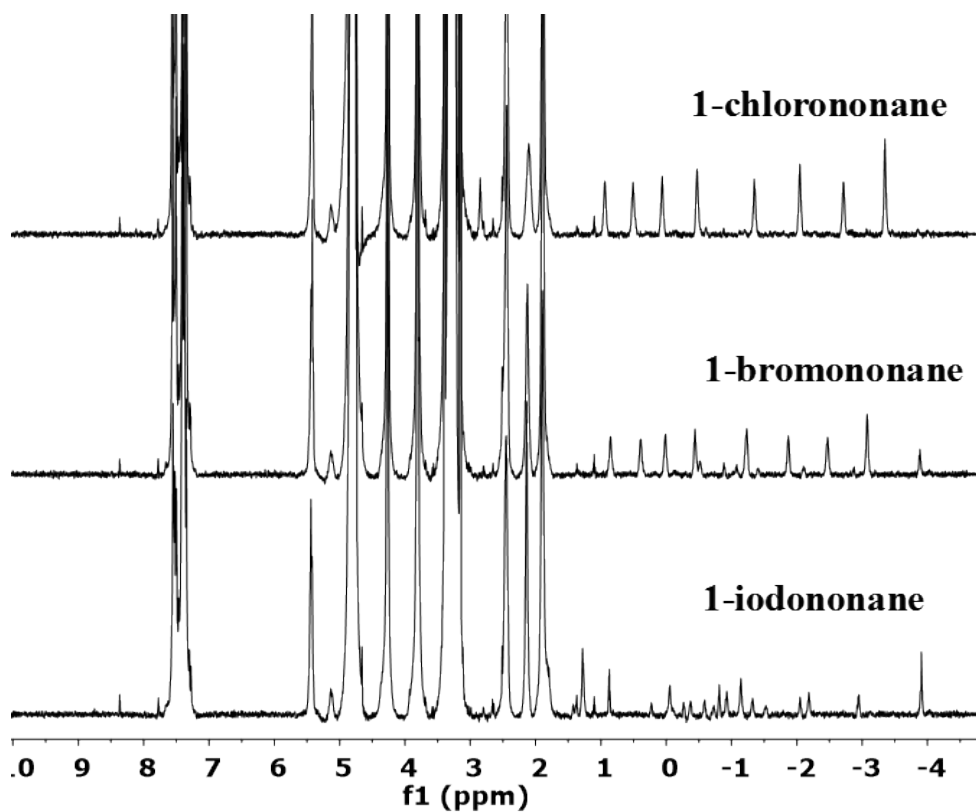

Figure S5. <sup>1</sup>H NMR spectra (600MHz, D<sub>2</sub>O, 298K) of cavitant **2** (1.0 mM) + 1-chlorononane (0.5 mM) (2:1), cavitant **2** (1.0 mM) + 1-bromononane (0.5 mM) (2:1), cavitant **2** (1.0 mM) + 1-iodononane (0.5 mM) (2:1).

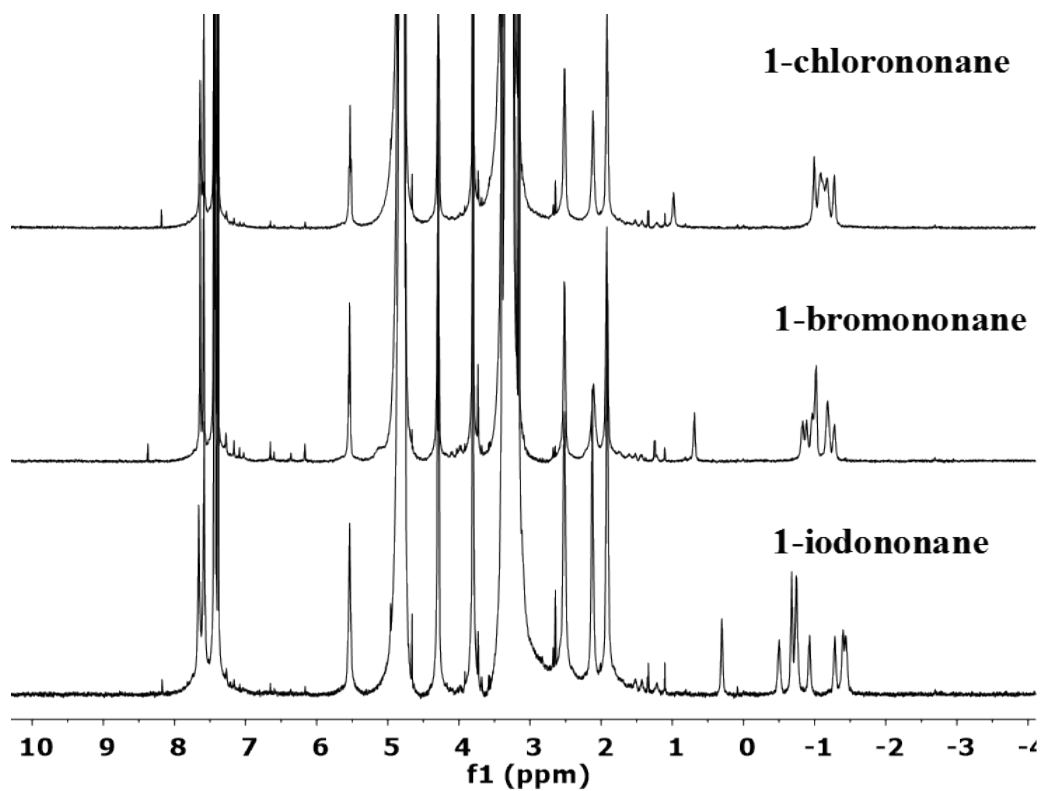

Figure S6.  $^1\text{H}$  NMR spectra (600MHz,  $\text{D}_2\text{O}$ , 298K) of cavitand **3** (1.0 mM) + 1-chlorononane (0.5 mM), cavitand **3** (1.0 mM) + 1-bromononane (0.5 mM), cavitand **3** (1.0 mM) + 1-iodononane (0.5 mM).

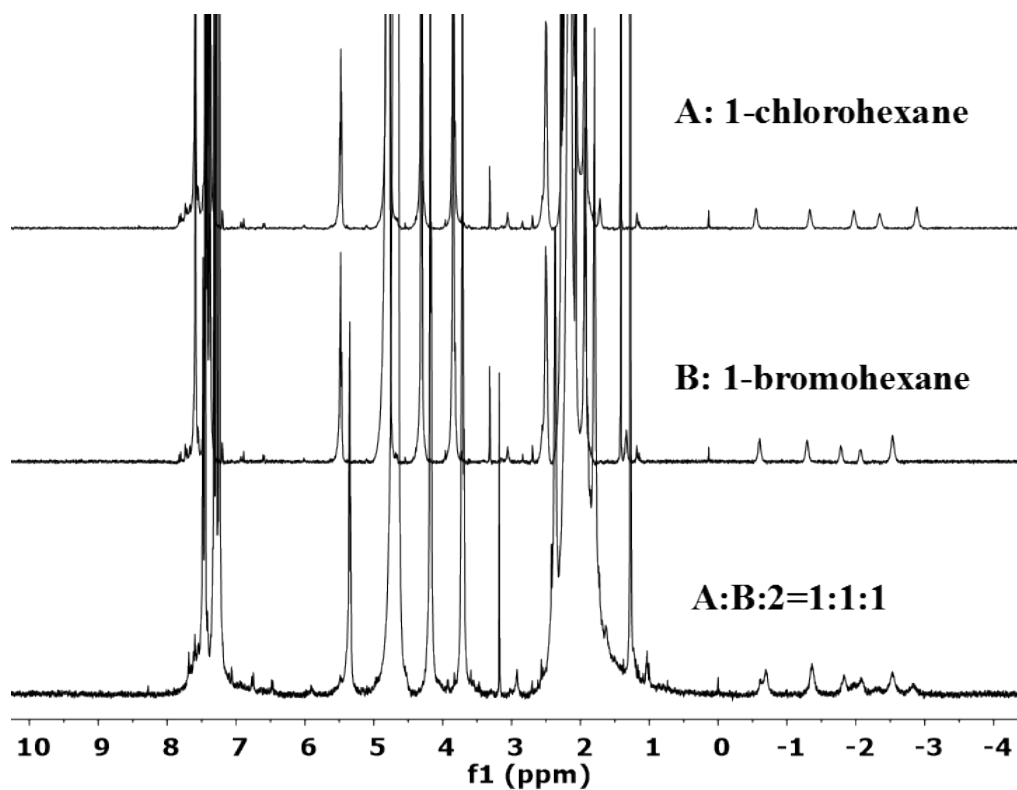

Figure S7.  $^1\text{H}$  NMR spectra (600MHz,  $\text{D}_2\text{O}$ , 298K) of cavitand **2** (1.0 mM) + 1-chlorohexane (1.0 mM) (1:1), cavitand **2** (1.0 mM) + 1-bromohexane (1.0 mM) (1:1), cavitand **2** (1.0 mM) + 1-chlorohexane (1.0 mM) + 1-bromohexane (1.0 mM) (1:1:1).

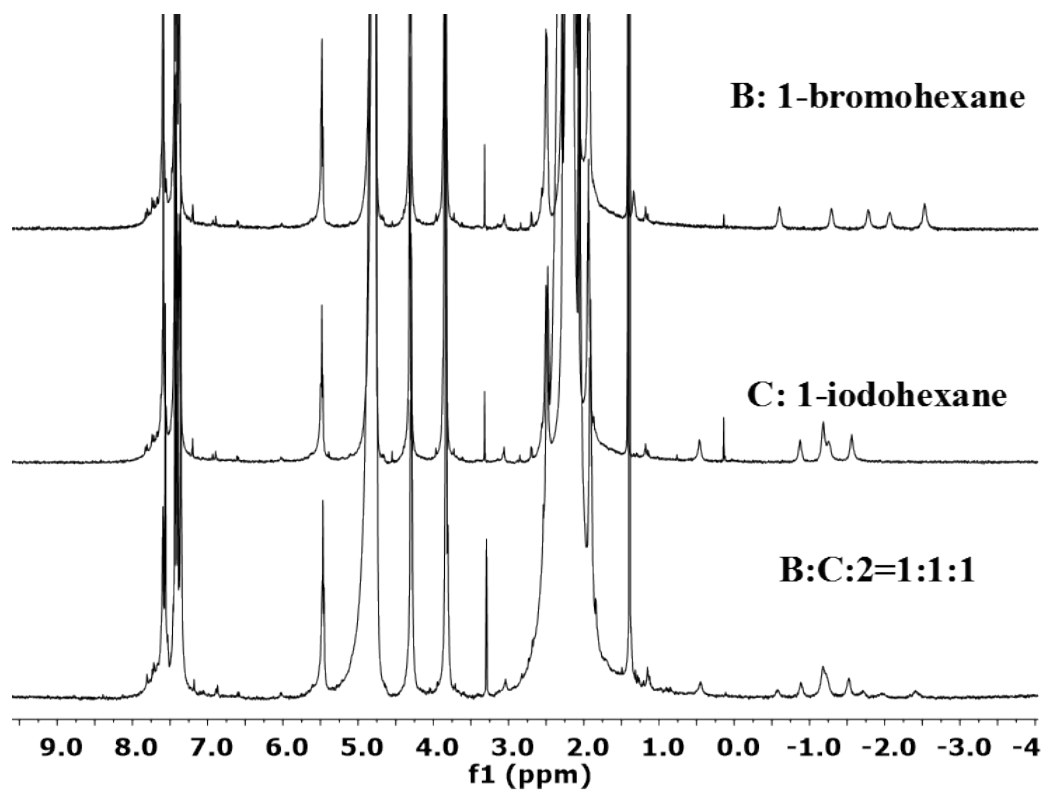

Figure S8. <sup>1</sup>H NMR spectra (600MHz, D<sub>2</sub>O, 298K) of cavitanid **2** (1.0 mM) + 1-bromohexane (1.0 mM) (1:1), cavitanid **2** (1.0 mM) + 1-iodohexane (1.0 mM) (1:1), cavitanid **2** (1.0 mM) + 1-bromohexane (1.0 mM) + 1-iodohexane (1.0 mM) (1:1:1).

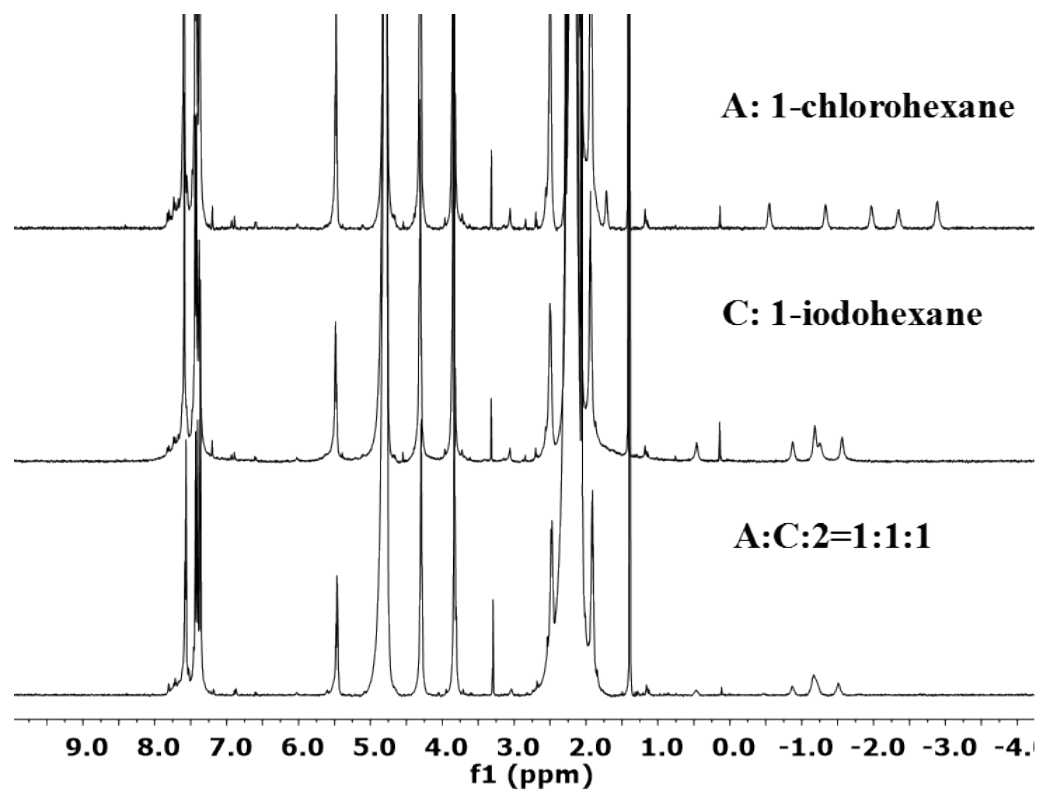

Figure S9. <sup>1</sup>H NMR spectra (600MHz, D<sub>2</sub>O, 298K) of cavitanid **2** (1.0 mM) + 1-chlorohexane (1.0 mM) (1:1), cavitanid **2** (1.0 mM) + 1-iodohexane (1.0 mM) (1:1), cavitanid **2** (1.0 mM) + 1-chlorohexane (1.0 mM) + 1-iodohexane (1.0 mM) (1:1:1).

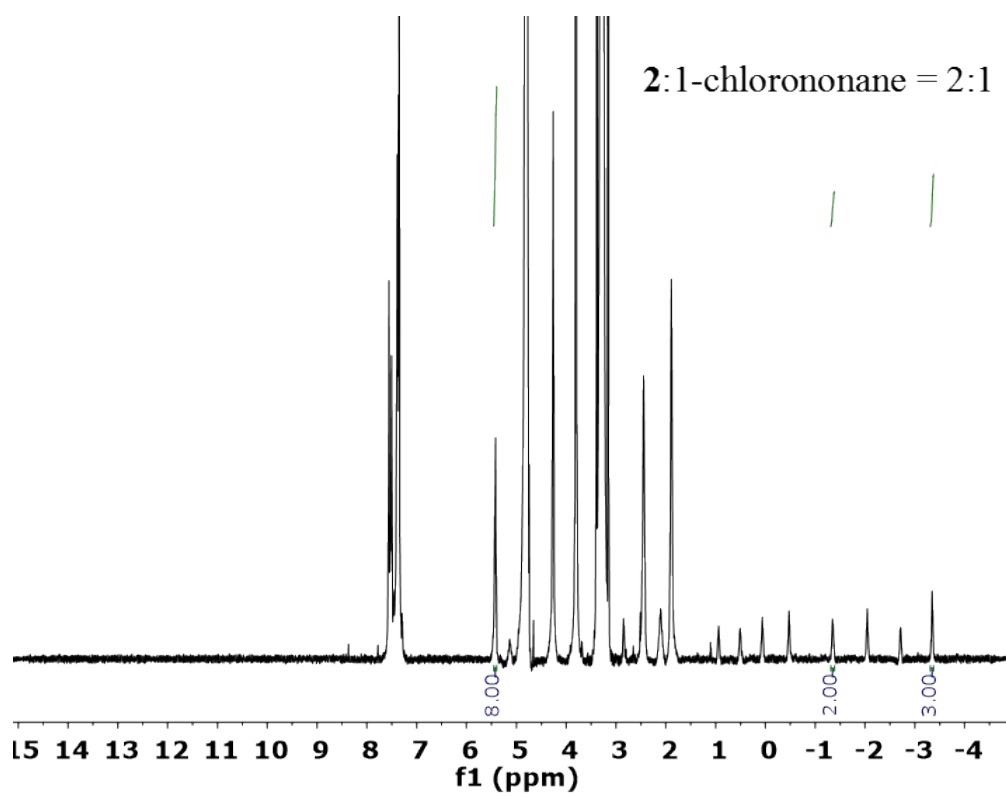

Figure S10.  $^1\text{H}$  NMR spectra (600MHz,  $\text{D}_2\text{O}$ , 298K) of cavitand **2** (1.0 mM) + 1-chlorononane (0.5 mM) (2:1).
